# Supplementary material for: Bicarbonate-controlled reduction of oxygen by the QA semiquinone in Photosystem II in membranes
Source: PubMed Central journal article supplement — Proc Natl Acad Sci U S A. 2022 Feb 3;119(6):e2116063119. doi: 10.1073/pnas.2116063119 (PMC8833163; doi:10.1073/pnas.2116063119), 2022-02-03
Supplement: pnas.2116063119.sapp.pdf [file pnas.2116063119.sapp.pdf]

Supporting information for

**Bicarbonate-controlled reduction of oxygen by the Q<sub>A</sub> semiquinone in Photosystem II in membranes**

Andrea Fantuzzi<sup>1\*</sup>, Friederike Allgöwer<sup>2</sup>, Holly Baker<sup>1</sup>, Gemma McGuire<sup>1</sup>, Wee Kii Teh<sup>1</sup>, Ana P. Gamiz-Hernandez<sup>2,3</sup>, Ville R. I. Kaila<sup>2,3\*</sup> and A. William Rutherford<sup>1\*</sup>

**Content:**

Extended methods

Supplementary figures: S1-S16

Supplementary Table S1

## Additional information on materials and methods

### *Materials*

5-(Diisopropoxyphosphoryl)-5-methyl-1-pyrroline-N-oxide (DIPPMPO) spin trap was purchased from ENZO and all other chemicals and proteins used were purchased from Sigma (DCMU/diuron, sodium bicarbonate, hydroxylamine, bovine catalase, equine cytochrome *c* (cyt *c*)).

### *Q<sub>A</sub> reoxidation using fluorometry*

All fluorescence measurements recorded using the Fluorometer FL3000, were carried out with the measuring and actinic flashes set to intensities of 10% and 100% respectively. The single turnover actinic flash duration was set to 50  $\mu$ s. Each experiment was run for 300 s with the first data point collected 100  $\mu$ s after the actinic flash.

Stocks of 1 mg Chl/ml PSII and 1M hydroxylamine were prepared in 40 mM of MES and 15 mM of MgCl<sub>2</sub> pH 6.5 and stored on ice in the dark until use. For the kinetic measurements the samples were prepared in a septum sealed cuvette. Final concentrations were 60 nM PSII and 250  $\mu$ M hydroxylamine in 40 mM of MES pH 6.5 and 15 mM of MgCl<sub>2</sub>. A dark adaptation period was set to 15 minutes, during which the samples were mixed, and oxygen was removed by flushing with argon. Oxygen was re-added to the system with a gas tight syringe by adding oxygenated buffer to the degassed samples in different proportion so that the total volume was maintained constant, avoiding the formation of a headspace in the sealed cuvette. The ratio of oxygenated to degassed buffer was such that the final concentration of oxygen in the sample ranged from 30-230  $\mu$ M. Final O<sub>2</sub> concentrations, upon each addition, were monitored using the Ocean Optics Neofox Phase oxygen sensor with the Neofox viewer software.

To measure the kinetics of Q<sub>A</sub><sup>-</sup> oxidation by O<sub>2</sub>, stable Q<sub>A</sub><sup>-</sup> was generated to which O<sub>2</sub> could be added in a controlled way. As photochemically generated Q<sub>A</sub><sup>-</sup> is normally re-oxidised by either transferring an electron to Q<sub>B</sub> or Q<sub>B</sub><sup>-</sup>, or by back reaction with S<sub>2/3</sub>, these reactions were prevented. We therefore used PSII samples that had sub-stoichiometric amounts of Q<sub>B</sub> (1). To estimate the amount of Q<sub>B</sub> available for electron transfer, three saturating flashes with a period of 1Hz were sufficient to reduce all the available Q<sub>B</sub> and led to the formation of Q<sub>A</sub><sup>-</sup> in the majority of the centres (Fig S1). In these conditions Q<sub>A</sub><sup>-</sup> re-oxidation occurred with a half-time of about 1 second by recombination with the S<sub>2</sub> or S<sub>3</sub> states. Since S<sub>2</sub>-S<sub>3</sub>/Q<sub>A</sub><sup>-</sup> recombination occurs within seconds, while S<sub>0</sub>-S<sub>1</sub>/Q<sub>A</sub><sup>-</sup> recombination has not been reported and is considered to be stable (2), reduction of the Mn<sub>4</sub>O<sub>5</sub>Ca cluster back to the S<sub>0</sub>/S<sub>1</sub> states should eliminate this competing reaction. It has previously been shown that hydroxylamine is able to act as a reductant to the Mn<sub>4</sub>O<sub>5</sub>Ca cluster in PSII (3). To avoid over-reduction of the Mn<sub>4</sub>O<sub>5</sub>Ca cluster, which would lead to loss of the cluster, different hydroxylamine concentrations were tested, and it was found that 250  $\mu$ M gave good and reproducible results maintaining the cluster intact in the

majority of the centres. Each dark-adapted sample, de-oxygenated by bubbling argon and in the presence of 250  $\mu\text{M}$  of hydroxylamine were subjected to three saturating flashes separated by  $\sim 120$  s. The fluorescence kinetics were measured upon each saturating flash for 120 s to monitor the accumulation of  $\text{Q}_\text{A}^-$  in a trapped state and assess the proportion of centres in which  $\text{Q}_\text{A}^-$  still decayed by forward electron transfer. The stability of the fluorescence signal, corresponding to the population of trapped  $\text{Q}_\text{A}^-$ , was assessed after the third 120 s period, by monitoring the fluorescence without any saturating flash. This allowed sufficient time for any metastable state in the presence of  $\text{S}_2$  and  $\text{S}_3$ , to recombine, leaving a discreet proportion of centres with a long-lived trapped  $\text{Q}_\text{A}^-$ . Once a stable fluorescence signal was recorded, oxygenated buffer was added.  $\text{Q}_\text{A}^-$  was stably trapped in approximately 40-50% of the PSII centres.

*ROS formation studied under continuous light conditions using cyt c reduction*

Samples were prepared in the same way as those used for the single-flash experiment, but hydroxylamine was omitted and samples were illuminated for either 5 or 20 minutes with 50  $\mu\text{mol photons m}^{-2} \text{ s}^{-1}$  red-filtered light (590 nm long-pass filter), followed by measuring the absorbance spectrum. Cyt *c* concentrations were calculated after subtracting the PSII absorbance spectrum as a background and then subtracting the non-illuminated control. The non-illuminated control and cyt *c* only controls were very similar indicating that there cyt *c* reduction being caused by PSII under dark conditions was negligible.

## Additional figures

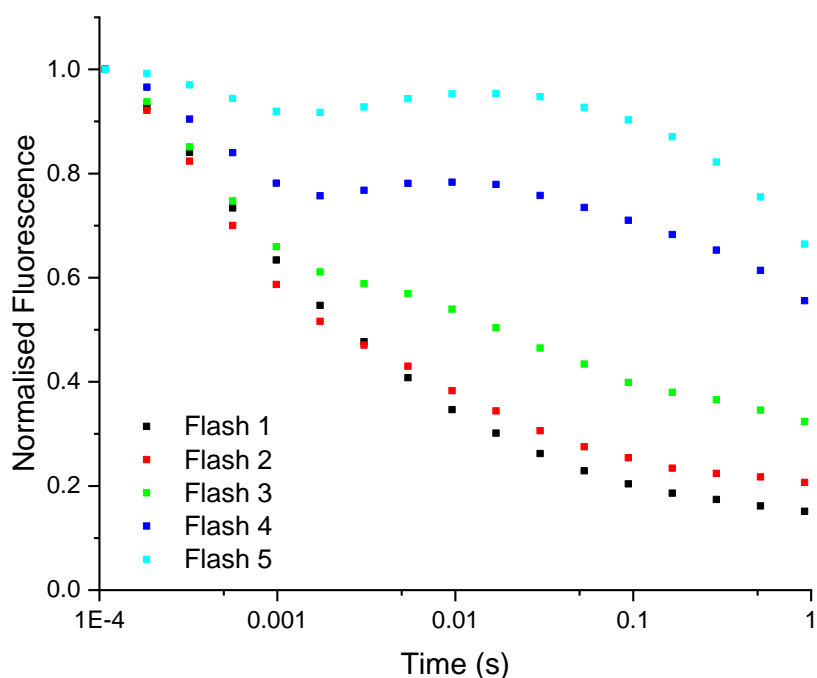

**Figure S1. Determination of the amount of available  $Q_B$  per reaction center.** Fluorescence kinetics decays were measured for PSII membrane fragments (60 nM PSII) in a 40 mM MES buffer, 5 mM  $MgCl_2$ , pH 6.5, upon each actinic flash in a series of flashes with a 1 Hz frequency. Kinetics after the first and the second flash clearly show a decay with a half-life in the milliseconds, characteristic of forward electron transfer from  $Q_A^-$  to both  $Q_B$  and  $Q_B^-$ . On the third and fourth flashes the amplitude of this milliseconds kinetic decay was progressively reduced to 40% and 25%, respectively, with the rest showing much slower decay times. On the fifth flash, the main decay half-life was approximately one second, typical of the  $S_2Q_A^-$  recombination. These data show that a maximum of two quinones are available per reaction center.

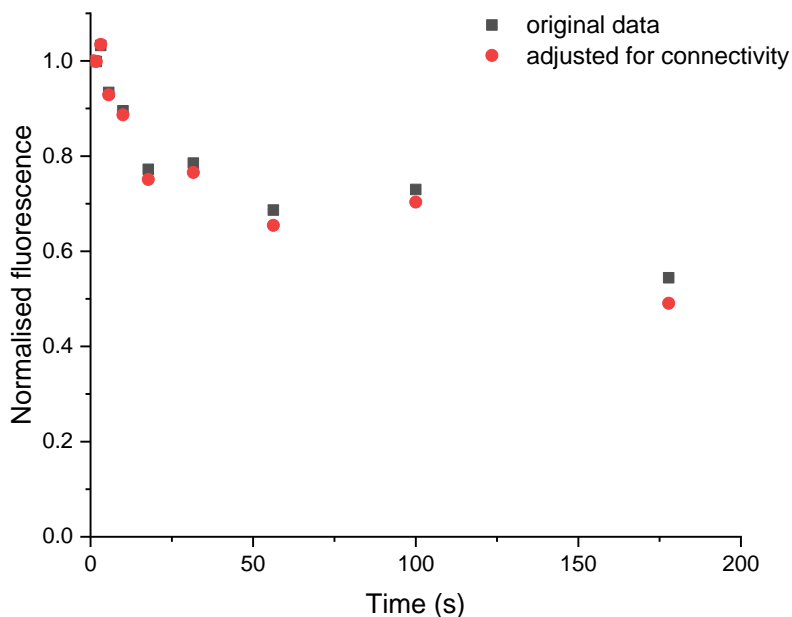

**Figure S2. The effect of antenna connectivity on the fluorescence-based measurement of the kinetics of  $Q_A^-$  re-oxidation by  $O_2$ .** Fraction of  $Q_A^-$  obtained from the fluorescence kinetics data (grey squares symbols) obtained for a degassed sample of PSII membrane fragments (60 nM PSII) in the presence of 250  $\mu$ M hydroxylamine in a 40 mM MES buffer, 5 mM  $MgCl_2$ , pH 6.5, when 40  $\mu$ M of oxygen was added. These data points are compared with the fraction of  $Q_A^-$  obtained by correcting the fluorescence values for the effect of connectivity between the reaction centres. Due to antenna connectivity the exciton visiting a closed centre has a significant probability of continuing its random walk and eventually hitting an open trap (5, 6). A consequence is that the fluorescence yield  $F$  depends on the fraction of closed centres,  $c$ , in a hyperbolic rather than linear way, according to the equation:

$$F(c) = c/(1+J-Jc) \quad (SE1)$$

The parameter  $J$  expresses the antenna connectivity. The non-linear relationship between the fluorescent yield  $F$  and the concentration of reduced  $Q_A$  has consequences on the correct determination of the fraction of reduced  $Q_A$  as a function of time in the decay. This effect was corrected using the  $J$  factor previously determined of 1.6.

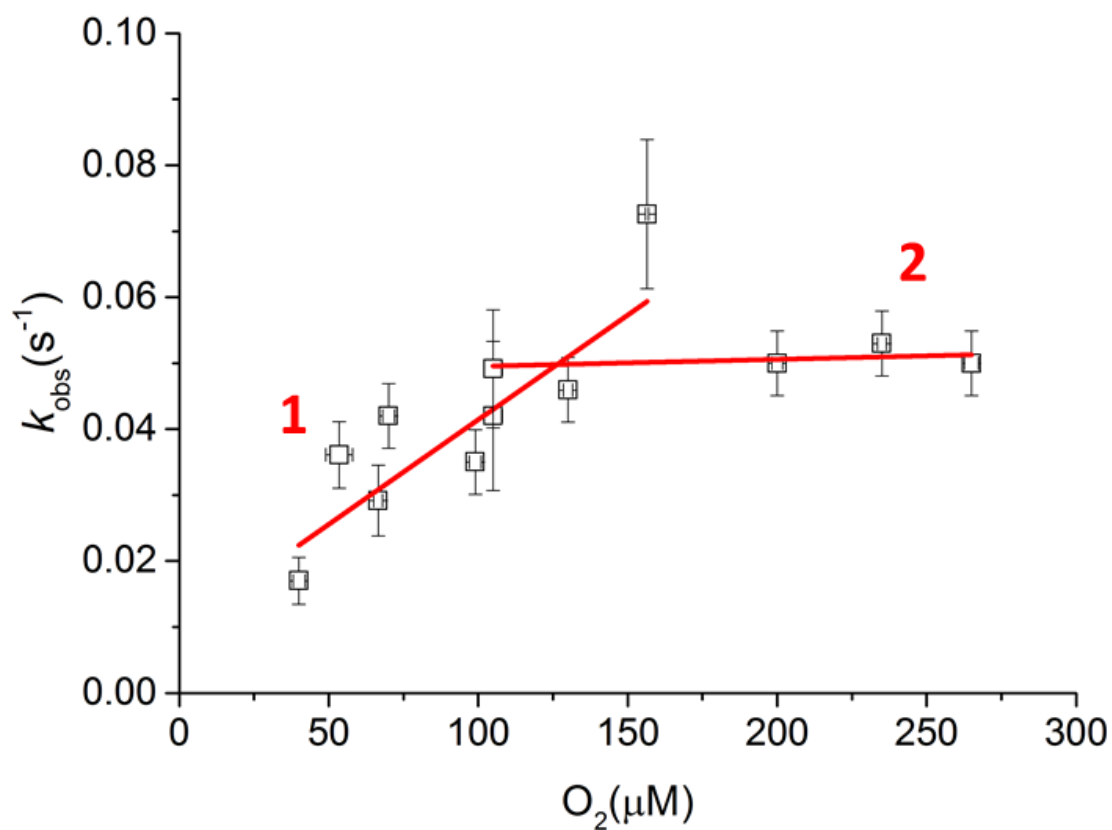

**Figure S3. Kinetics of  $\text{Q}_\text{A}^-$  oxidation.** Rate of  $\text{Q}_\text{A}^-$  oxidation plotted as a function of  $\text{O}_2$  concentration. Data from figure 2C in the main paper fitted with two linear behaviours corresponding to the second (1) and zero (2) order of the reaction. The slope of the linear fitting (1) yields the second order rate constant for the bimolecular interaction between  $\text{Q}_\text{A}^-$  and  $\text{O}_2$ .

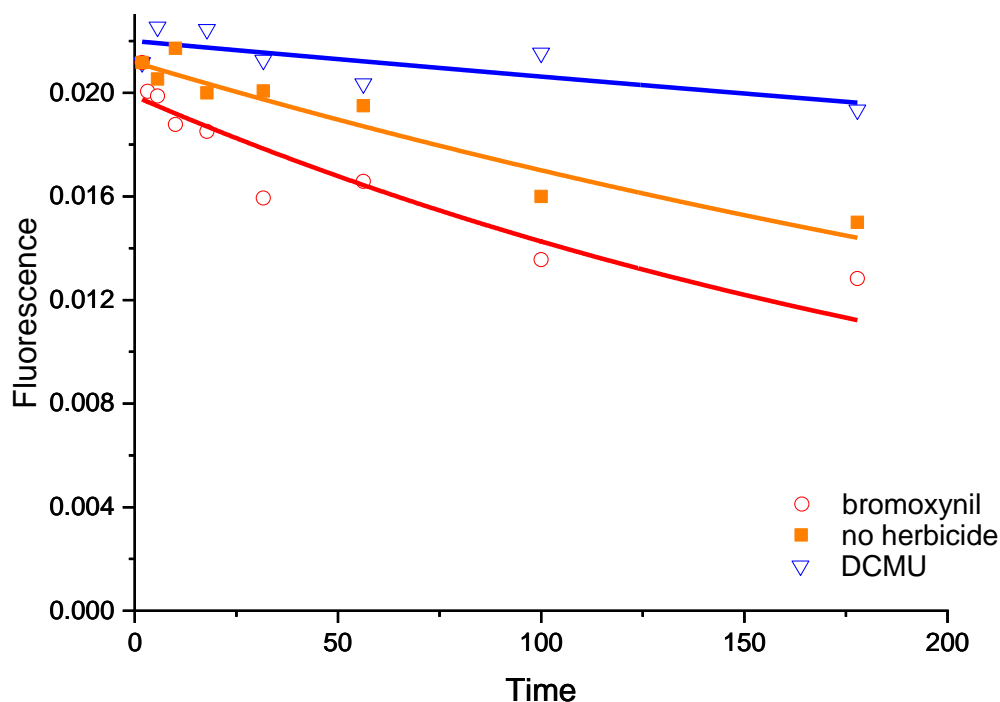

**Fig S4.** Fluorescence decay from trapped  $Q_A^-$  in the absence of oxygen. The slow decay was assigned to the  $Ty_{TD}^+ Q_A^-$  recombination. The decays are shown in the absence and the presence of added herbicides. The measured kinetics in the presence of bromoxynil (red circles and line) is faster than the one in the presence of DCMU (blue triangles and line). The kinetic measured in the absence of the herbicides (orange squares and line) shows rates in between the other two kinetics.

These data, therefore, confirm firstly that the slow fluorescence decay observed in the trapped  $Q_A^-$  in the absence of oxygen is due to the recombination of  $Q_A^-$  with a relatively stable electron acceptor thought to be  $Ty_{TD}^+$  (4). Secondly, that bromoxynil is bound to the  $Q_B$  site also in the presence of hydroxylamine and behaves as expected in the untreated PSII.

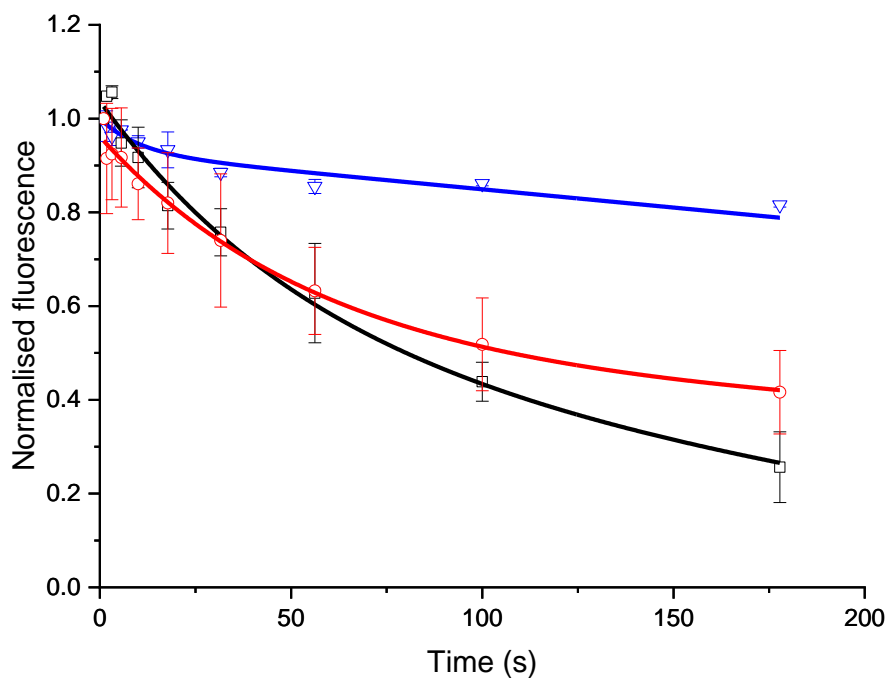

**Figure S5. The effect of  $Q_B$ -site herbicides on the kinetics of  $Q_A^-$  re-oxidation by  $O_2$ .** Fraction of  $Q_A^-$  obtained after three saturating flashes of a degassed sample of PSII membrane fragments (60 nM PSII cores) in the presence of 250  $\mu$ M hydroxylamine in a 40 mM MES buffer, 5 mM  $MgCl_2$ , pH 6.5. All the data are fitted to equation 1. Effect of the addition of  $Q_B$  site inhibitors. Control experiment with oxygen and no herbicide is shown for comparison (open black symbols). 10  $\mu$ M DCMU (open blue symbols) or 100  $\mu$ M bromoxynil (open red symbols) were added prior to the degassing step and the kinetics were measured upon addition of  $40 \pm 3 \mu$ M  $O_2$ .



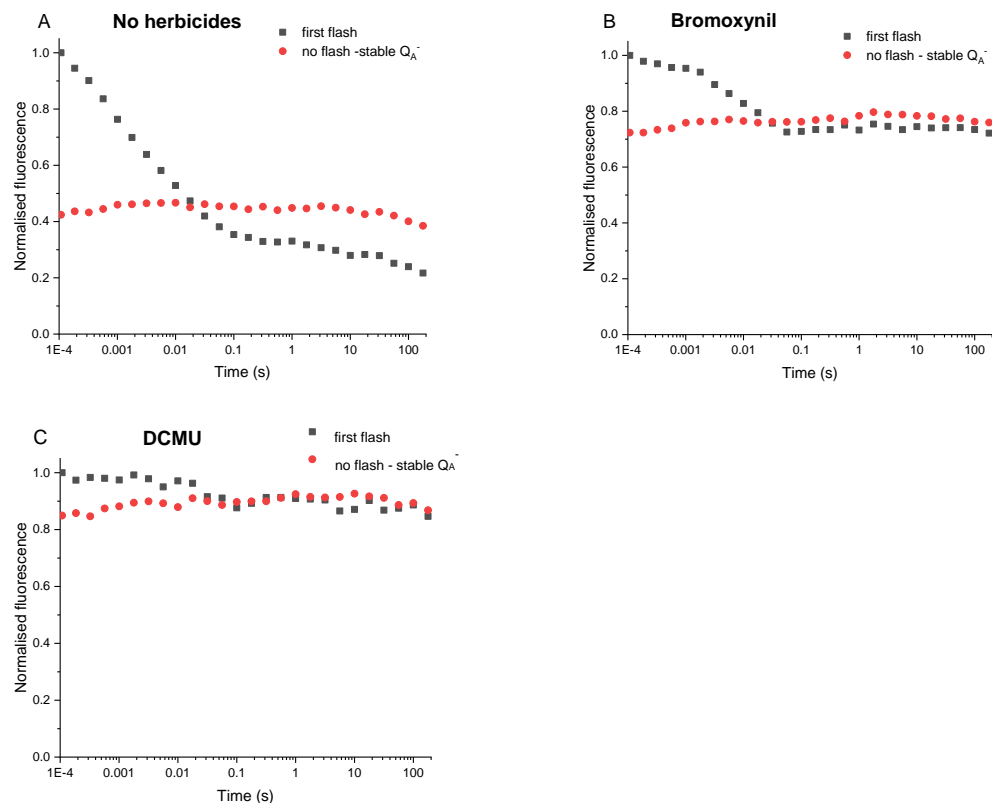

**Fig S6.**  $Q_A^-$  reoxidation kinetics in the presence of 250  $\mu$ M hydroxylamine and no oxygen. Fluorescence decay kinetics recorded upon the first of the three saturating flashes are shown as black squares. In the absence of herbicides (**A**), on the first flash the largest proportion of the decay is dominated by forward electron transfer from  $Q_A^-$  to either  $Q_B$  or  $Q_B^-$  ( $\sim 1$  ms). Approximately 30% of the centers show  $Q_A^-$  in a locked state (due to the depleted PQ pool, the absence of  $O_2$ , and “irreversible” donation from, e.g.,  $NH_2OH$ ,  $S_0$ ,  $Ty_{FD}$ , or  $Cyt_{b559}$ ). This percentage was found to increase in the subsequent flashes to a level of 40-50% (see fluorescence level of the red data points in panel **A**). In the presence of both bromoxynil and DCMU, the fluorescence profile following the first flash is instead dominated by  $Q_A^-$  in the locked state (panels **B**, **C**). DCMU shows 10% of the centers doing  $S_2Q_A^-$  charge recombination (a few seconds), while Bromoxynil shows about 10% of centers doing forward electron transfer from  $Q_A^-$  to  $Q_B/Q_B^-$  (i.e., centers where bromoxynil does not bind) and about 15% of centers that appears to be doing  $S_2Q_A^-$  charge recombination ( $\sim 500$  ms in competition with reduction of  $S_2$  by  $NH_2OH$ ). The 10% of centers doing forward electron transfer in the presence of bromoxynil is due to the herbicide lower binding affinity. Nevertheless, the data clearly show that bromoxynil binds to the majority of centers even when hydroxylamine is present. Importantly, in all the experimental conditions used for the observations made here, we only studied the majority fraction of centers in which  $Q_A^-$  was stably trapped. Any centers in which  $Q_A^-$  undergoes charge recombination will be absent from the measurement because of the addition of oxygen was performed only after the signal of the stable  $Q_A^-$  was recorded without any additional saturating light pulses (red data points in the figure).

**A**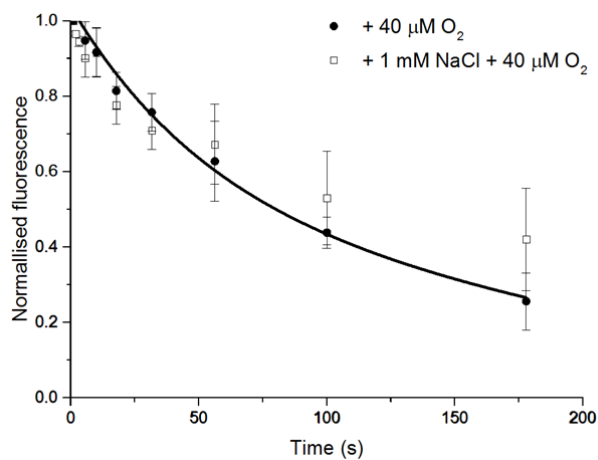**B**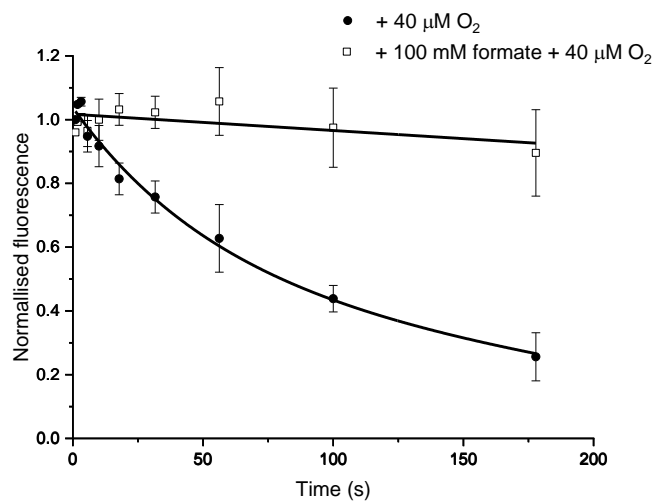

**Figure S7. Kinetics of  $\text{Q}_\text{A}^-$  re-oxidation by  $\text{O}_2$ : effect of NaCl (control for bicarbonate addition) and effect of formate.** Fraction of  $\text{Q}_\text{A}^-$  obtained after three saturating flashes of a degassed sample of PSII membrane fragments (60 nM PSII) in the presence of 250  $\mu\text{M}$  hydroxylamine in a 40 mM MES buffer, 5 mM  $\text{MgCl}_2$ , pH 6.5. 40  $\mu\text{M}$  of  $\text{O}_2$  was added in the absence or in the presence of (A) 1mM NaCl and (B) 100 mM formate.

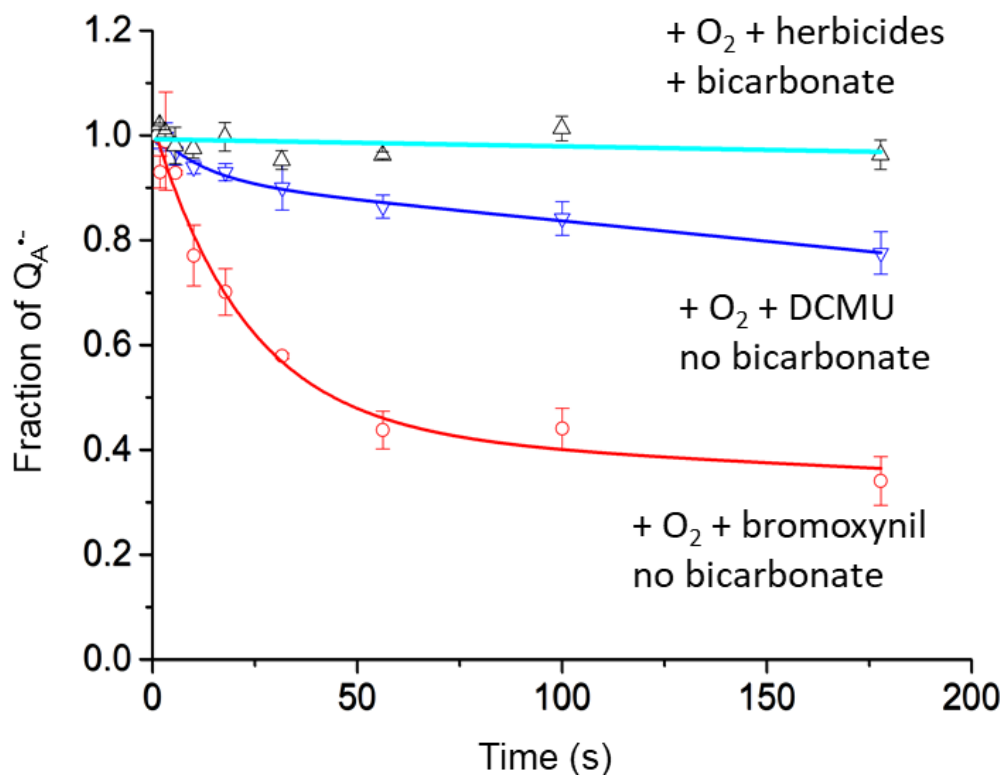

**Figure S8. Kinetics of  $Q_A^{\bullet-}$  oxidation.** (A) Effect of presence of bicarbonate of the influence of herbicides on the kinetics of  $Q_A^{\bullet-}$  re-oxidation by  $O_2$ . Data from figure 2B (blue and red curves for sample with 10  $\mu$ M DCMU and 100  $\mu$ M bromoxynil respectively) are compared with the combined effect of either of two herbicides (DCMU or bromoxynil) and 1 mM bicarbonate (cyan curve). For clarity only the data with DCMU + bicarbonate are shown as those with bromoxynil + bicarbonate are almost identical.

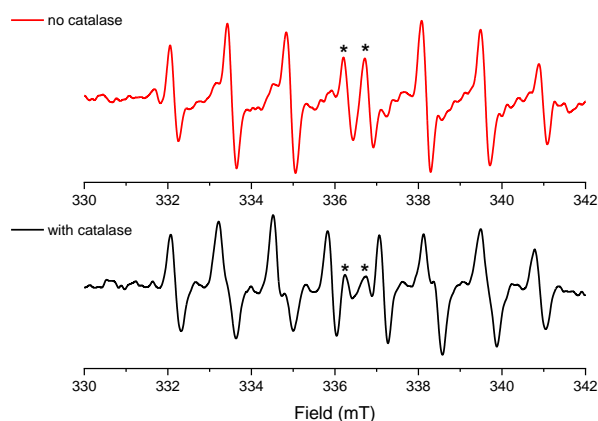

**Fig S9 Characterisation of the EPR spectra of the DIPPMPPO spin probe adducts.** In our initial measurements aimed at identifying the product of the reduction of oxygen by  $Q_A^-$  using the DIPPMPPO EPR spin probe, we observed a spectrum (red trace) with features reminiscent of the DIPPMPPO-OH adduct (7). DIPPMPPO-OH, formed by the reaction of DIPPMPPO with hydroxyl radical, has specific features, labelled with asterisks (\*) in the figure, that are unique when compared with the EPR spectrum of the DIPPMPPO-OOH obtained from the reaction with superoxide (see Ref 7 for a comparison of the spectra). Addition of catalase, which removes peroxide (formed by dismutation of the  $O_2^{\cdot-}$ ), which could give rise to  $OH^{\cdot}$  by Fenton chemistry, resulted in a spectrum (black trace) in which the contribution of the DIPPMPPO-OH adduct was greatly reduced based on the intensity of the two central peaks (\*).

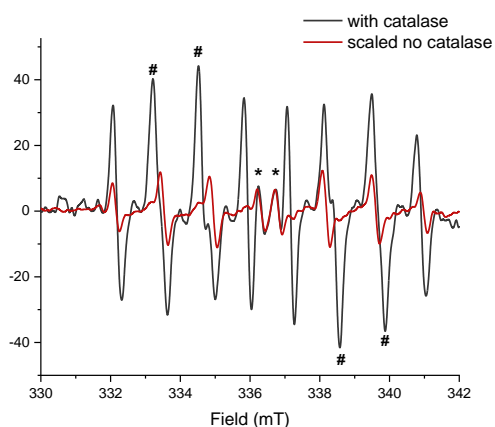

**Fig S10** To quantify the residual contribution of the DIPPMPPO-OH adduct upon addition of catalase, we scaled the spectrum obtained without catalase, to match the intensity of the two central peaks (\*). Based on this scaling we assessed that about 20% of DIPPMPPO-OH is still present when catalase is added. Nevertheless, the scaling also shows that the peaks used for the identification of DIPPMPPO-OOH (#) have minimal contribution from the DIPPMPPO-OH spectra.

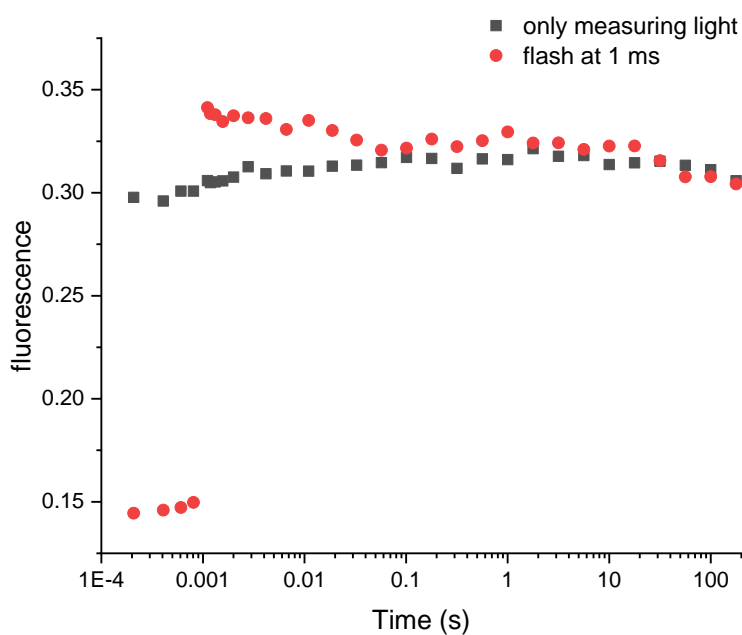

**Figure S11. Assessing the actinic nature of the measuring light in the fluorescence experiments.**

Fluorescence was measured for a degassed sample of PSII membrane fragments (60 nM PSII) in the presence of 250  $\mu\text{M}$  hydroxylamine in a 40 mM MES buffer, 5 mM  $\text{MgCl}_2$ , pH 6.5 and 10  $\mu\text{M}$  DCMU. Each data point in the graph represents a fluorescence value detected by a single weak measuring pulse from a 650nm LED. The red filled circles represent the measurements obtained when a single saturating flash was given at 1 ms to a sample that had been dark-adapted for 15 minutes during the degassing process. The fluorescence level remains high and constant after the flash with only a small decay in the hundreds of seconds. The black filled squares represent the fluorescence measurement done on the same sample immediately after recording the first kinetic data set. As a result, the first data point (black points) coincides with the last data point of the previous kinetics data set (red points). The fluorescence values remain high and relatively stable, showing the same slow decay in the hundreds of seconds. This slow decay corresponds to the linear decay shown by the orange points in figure 2A. Nevertheless, a small rise in fluorescence can be observed when the frequency of the weak measuring flashes is high, between 1 and 10 ms. When instead the frequency is low in the rest of the kinetics the fluorescence values remain constant. These data show that the measuring flashes are slightly actinic when their frequency is high, between 1 and 10 ms, leading to a small accumulation, approximately 10%, of reduced  $Q_A$ .

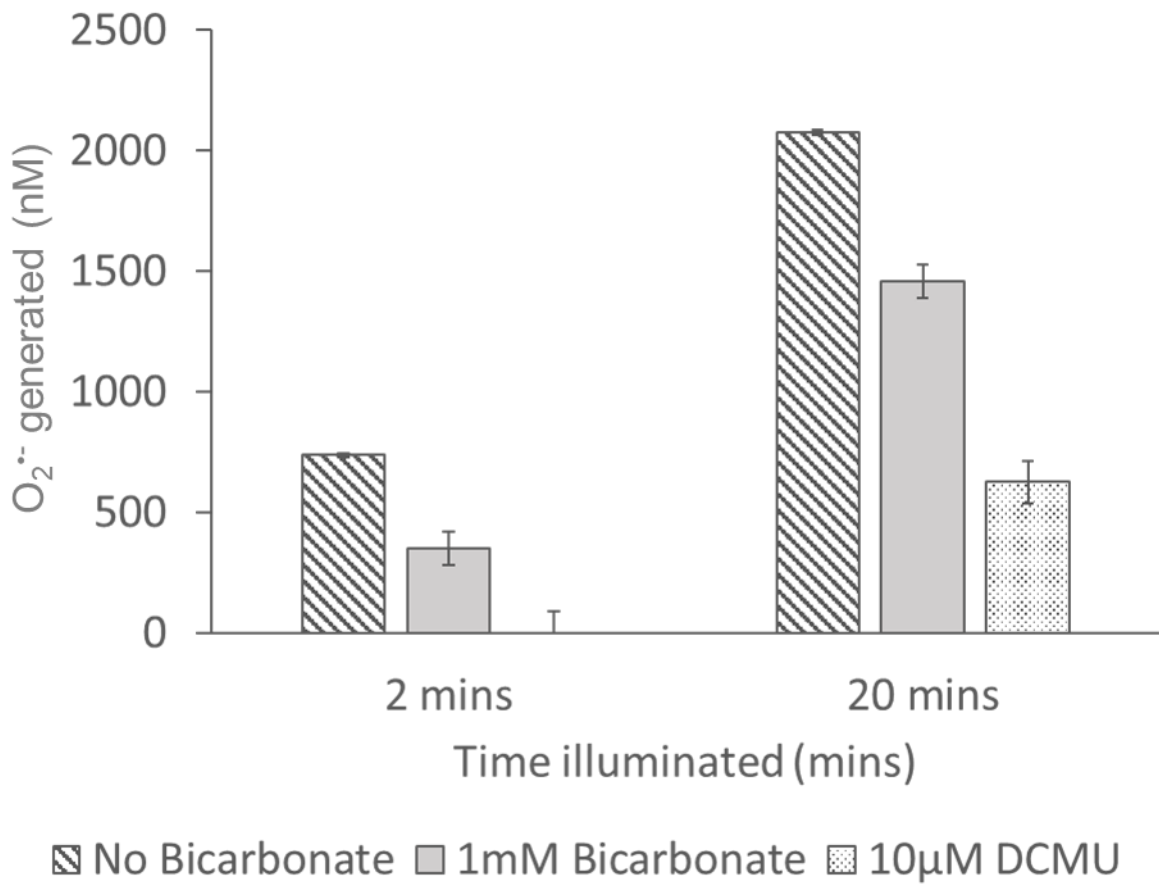

**Figure S12.**  $O_2^{\cdot-}$  quantified as reduced cytochrome *c* in the absence (striped) and in the presence of either 1 mM bicarbonate (grey) or 10 mM DCMU (dots). Sample was illuminated for either 2 or 20 minutes with  $50 \mu\text{mol photons m}^{-2} \text{s}^{-1}$  red light (590 nm long-pass filter). PSII membrane fragments (60 nM PSII) in 40 mM MES buffer, 5 mM  $\text{MgCl}_2$ , pH 6.5.

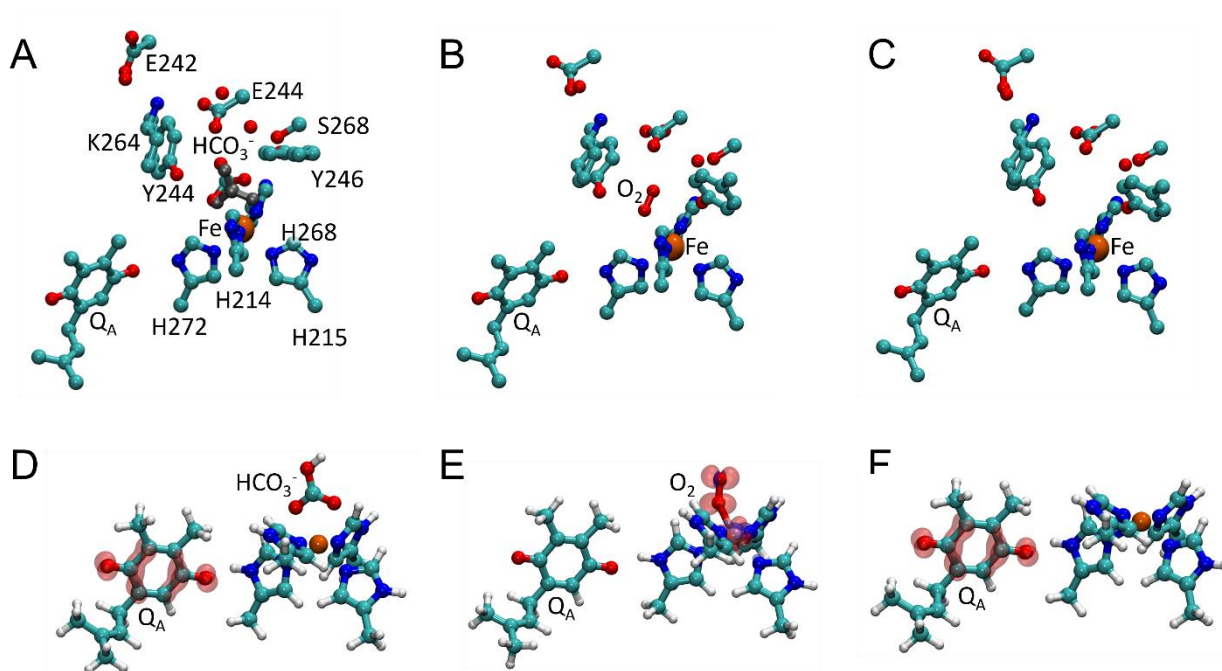

**Figure S13. DFT models and QM/MM systems.** The QM region comprises the non-heme  $\text{Fe}^{2+}$  complex with its four coordinating histidine residues (His215<sup>D1</sup>, His272<sup>D1</sup>, His214<sup>D2</sup>, and His268<sup>D2</sup>), the plastoquinone  $\text{Q}_A$ , Glu244<sup>D1</sup>, Tyr246<sup>D1</sup>, Ser268<sup>D1</sup>, Tyr244<sup>D2</sup>, Lys264<sup>D2</sup>, in addition to three crystal water molecules and (A) the  $\text{HCO}_3^-$ -bound state ( $\text{Fe}^{3+}$ - $\text{HCO}_3^-$  shown in grey); (B) the  $\text{O}_2$ -bound state, and (C) the state lacking the exchangeable  $\text{HCO}_3^-$  ligand. (D)–(F) spin density differences (red/blue sphere  $\pm 0.001e$  for alpha/beta spin) after adding an electron into models A–C: (D) the  $\text{HCO}_3^-$ -bound state, (E) the  $\text{O}_2$ -bound state, and (F) the state lacking exchangeable ligands. For clarity, panels D–F show only  $\text{Q}_A$ , the iron and its ligands (*i.e.*, the four histidines in addition to either  $\text{HCO}_3^-$  or  $\text{O}_2$ ).

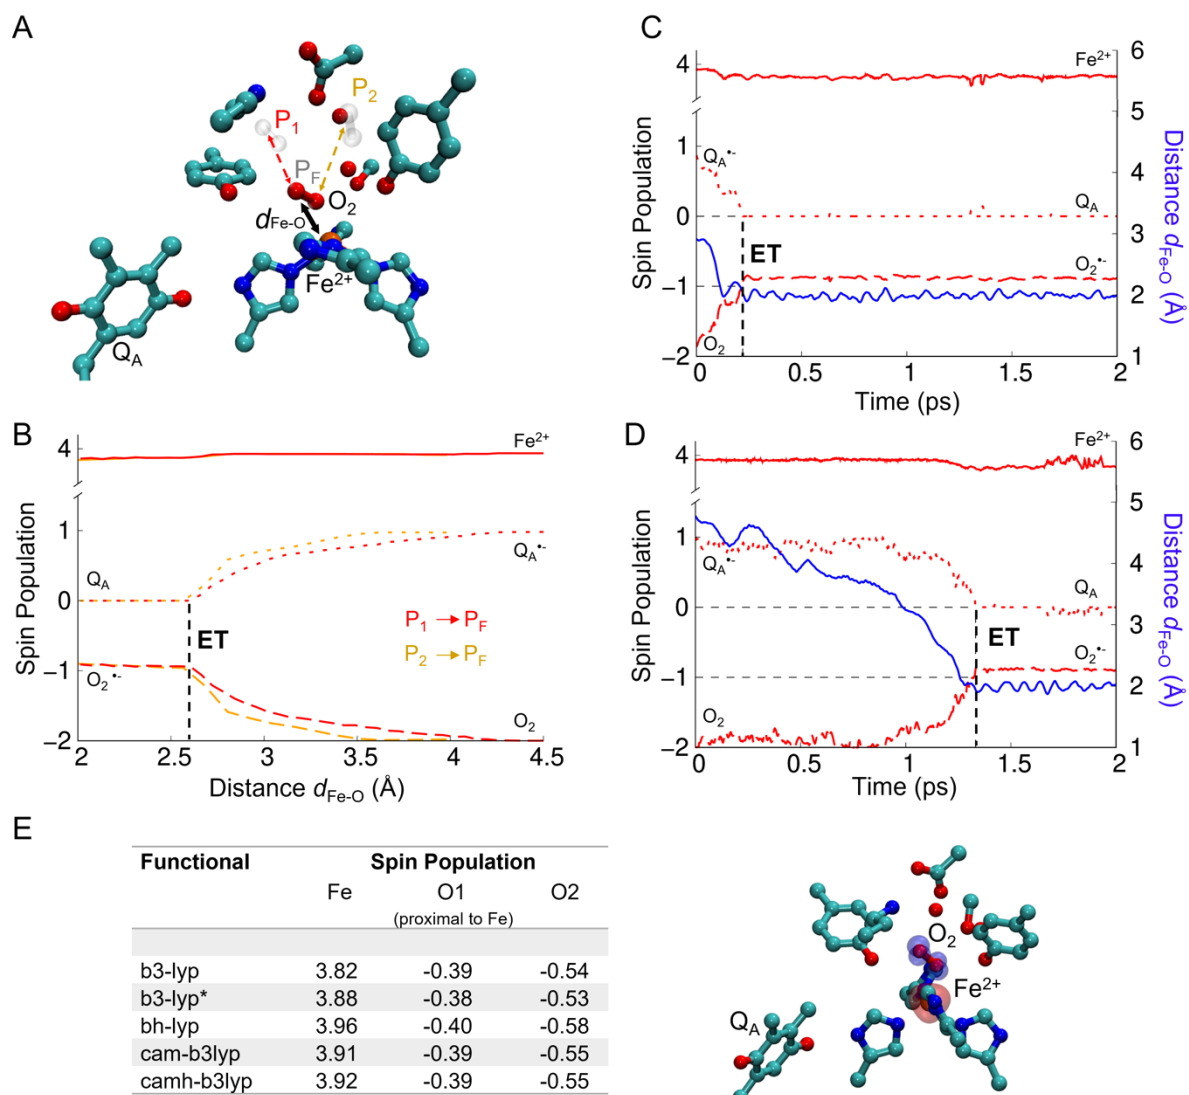

**Figure S14. Electron transfer dynamics at the non-heme iron center.** (A) To probe at which Fe-O<sub>2</sub> distance the electron transfer (ET) is triggered, the O<sub>2</sub> was placed at two different starting positions (P<sub>1</sub> and P<sub>2</sub>) and then gradually moved closer towards the Fe<sup>2+</sup> (final geometry optimized position: P<sub>F</sub>). (B) spin populations change with respect to the  $d_{\text{Fe-O}}$  distance. The electron transfer is completed at a Fe-O<sub>2</sub> distance of around 2.6 Å (ET; black dashed line) independent of the starting position. (C) and (D) ET-dynamics during QM/MM MD simulations. The simulations were initiated from different initial Fe-O<sub>2</sub> distances, (C) 2.9 Å and (D) 4.8 Å. In both simulations, the electron transfer initiates at ~3 Å and is complete at ~2 Å (ET; black dashed line). Spin population on Q<sub>A</sub> are shown as dotted lines; on Fe<sup>2+</sup> as solid lines, and on O<sub>2</sub> as dashed lines. (E) Spin population analysis (table) using different density functionals and the spin density (right figure) show that the electron transfer from Q<sub>A</sub><sup>-</sup> to Fe-O<sub>2</sub> is supported using different density functionals.



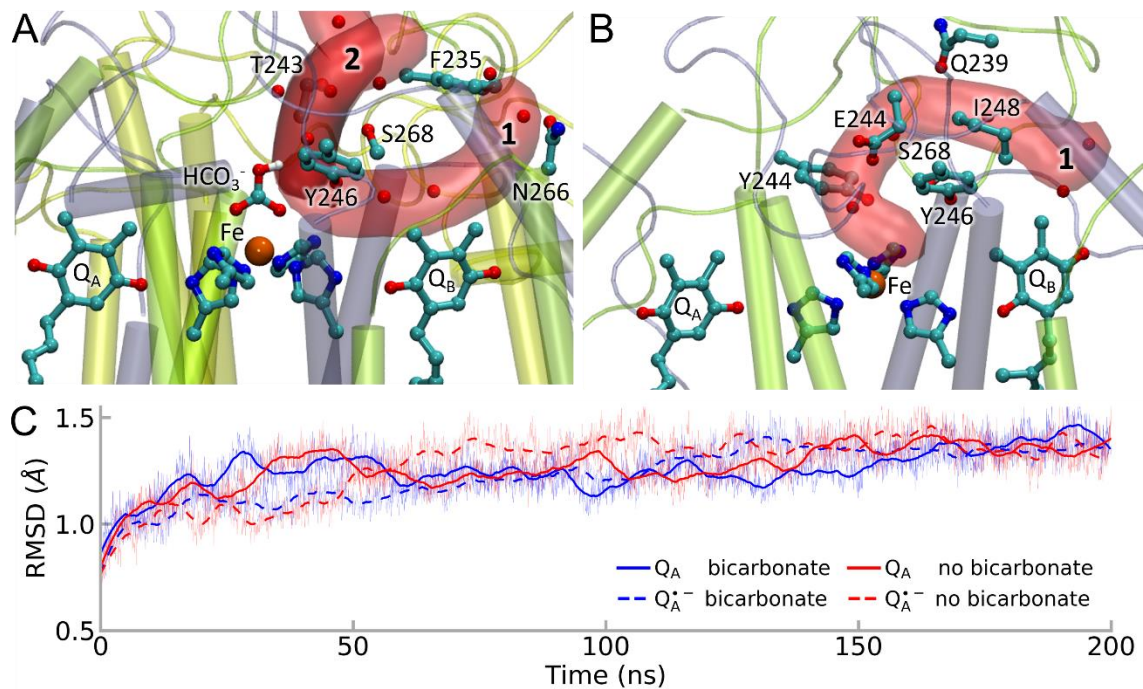

**Figure S15. Water-filled tunnels forming around the plastoquinone site during MD simulations of PSII.** (A) In the  $\text{HCO}_3^-$ -bound form, tunnels 1 and 2 are present near the non-heme iron site, but water molecules are blocked from reaching the non-heme iron center by i) the bicarbonate itself (shown here) and ii) the nearby Lys264, which undergoes conformational changes relative to the crystal structure and leads to a decrease of hydration (shown in Fig. 4F). (B) When no exchangeable ligands were bound to the  $\text{Fe}^{2+}$ , the tunnels extended to the  $\text{Fe}^{2+}$ , allowing water or dioxygen to access the non-heme iron site. (C) Root-mean-square-deviations (RMSD) of the complete PSII during MD simulations, showing stabilization during the initial 100 ns.

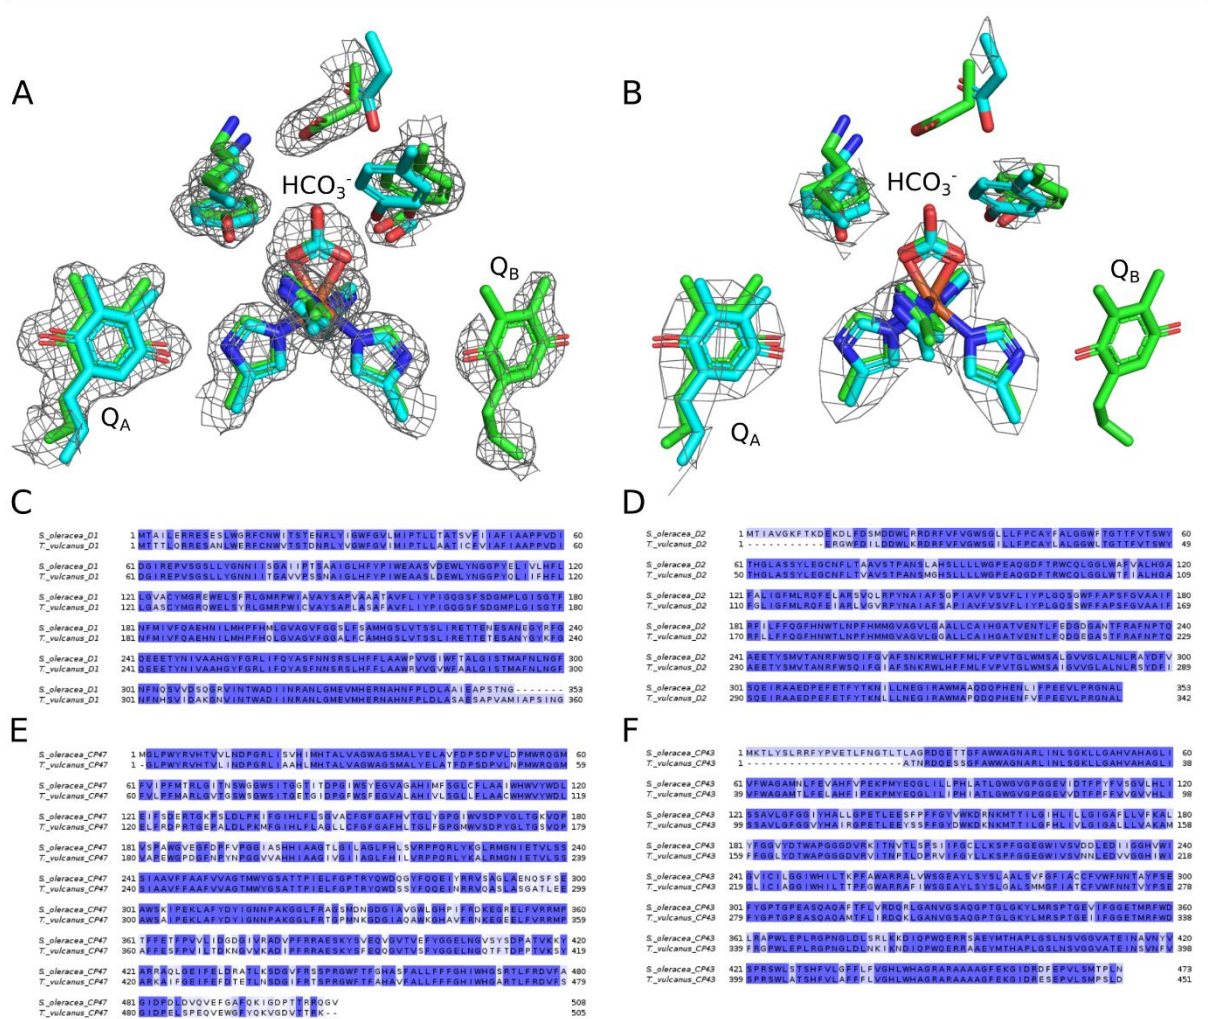

**Fig S16.** Structural comparison between A) the cyanobacterial (*T. vulcanus*, PDB ID: 3WU2, in red). Density is shown at 1 $\sigma$  level. B) Spinach PSII (*S. oleracea*, PDB ID: 3JCU, in blue), with cryoEM densities (EMD-6617) at shown 4.5 $\sigma$  level. The Q<sub>B</sub> is unresolved but modeled based on the cyanobacterial structure. C-D) Sequence comparison between PSII from *T. vulcanus* and *S. oleracea* for subunits A) D1, B) CP47, C) CP43 and D) D2. Identical residues are marked in dark blue; similar residues in light blue; and different residues in white. The overall sequence identity is 85% for D1, 76% for CP47; 80% for CP43; and 87% for D2.

**Table S1. Summary of DFT, QM/MM-MD, and classical MD simulations.** Simulations 11 and 12 were initiated with initial Fe<sup>2+</sup>...O<sub>2</sub> distances, of 2.9 Å and 4.8 Å respectively.

| Simulation | Fe <sup>2+</sup> -ligand      | Redox State of Q <sub>A</sub> | Method   | System size (Atoms) | Simulation length |
|------------|-------------------------------|-------------------------------|----------|---------------------|-------------------|
| 1          | -                             | Q <sub>A</sub>                | DFT      | 155                 | optimization      |
| 2          | -                             | Q <sub>A</sub> <sup>-</sup>   | DFT      | 155                 | optimization      |
| 3          | HCO <sub>3</sub> <sup>-</sup> | Q <sub>A</sub>                | DFT      | 160                 | optimization      |
| 4          | HCO <sub>3</sub> <sup>-</sup> | Q <sub>A</sub> <sup>-</sup>   | DFT      | 160                 | optimization      |
| 5          | O <sub>2</sub>                | Q <sub>A</sub>                | DFT      | 157                 | optimization      |
| 6          | O <sub>2</sub>                | Q <sub>A</sub> <sup>-</sup>   | DFT      | 157                 | optimization      |
| 7          | H <sub>2</sub> O              | Q <sub>A</sub>                | DFT      | 158                 | optimization      |
| 8          | H <sub>2</sub> O              | Q <sub>A</sub> <sup>-</sup>   | DFT      | 158                 | optimization      |
| 9          | -                             | Q <sub>A</sub> <sup>-</sup>   | QM/MM MD | 65,197              | 2 ps              |
| 10         | HCO <sub>3</sub> <sup>-</sup> | Q <sub>A</sub> <sup>-</sup>   | QM/MM MD | 65,203              | 2 ps              |
| 11         | O <sub>2</sub>                | Q <sub>A</sub> <sup>-</sup>   | QM/MM MD | 65,202              | 2 ps              |
| 12         | O <sub>2</sub>                | Q <sub>A</sub> <sup>-</sup>   | QM/MM MD | 65,202              | 2 ps              |
| 13         | -                             | Q <sub>A</sub>                | MD       | 425,395             | 200 ns            |
| 14         | -                             | Q <sub>A</sub> <sup>-</sup>   | MD       | 425,396             | 200 ns            |
| 15         | HCO <sub>3</sub> <sup>-</sup> | Q <sub>A</sub>                | MD       | 425,401             | 200 ns            |
| 16         | HCO <sub>3</sub> <sup>-</sup> | Q <sub>A</sub> <sup>-</sup>   | MD       | 425,400             | 200 ns            |

## SI References

1. A. Krieger-Liszak, A. W. Rutherford, Influence of Herbicide Binding on the Redox Potential of the Quinone Acceptor in Photosystem II: Relevance to Photodamage and Phytotoxicity. *Biochemistry* **37**, 17339-17344 (1998).
2. A. W. Rutherford, A. R. Crofts, Y. Inoue, Thermoluminescence as a probe of Photosystem II photochemistry. The origin of the flash-induced glow peaks. *Biochim. Biophys. Acta - Bioenergetics* **682**, 457-465 (1982).
3. R. D. Guiles *et al.*, The S<sub>0</sub> state of photosystem II induced by hydroxylamine: differences between the structure of the manganese complex in the S<sub>0</sub> and S<sub>1</sub> states determined by x-ray absorption spectroscopy. *Biochemistry* **29**, 486-496 (1990).
4. G. N. Johnson, A. Boussac, A. W. Rutherford, The origin of 40–50°C thermoluminescence bands in Photosystem II. *Biochim. Biophys. Acta - Bioenergetics* **1184**, 85-92 (1994).
5. A. Joliot, P. Joliot, Etude cinétique de la réaction photochimique libérant l'oxygène au cours de la photosynthèse. *C.R. Acad. Sci. Paris* **258**, 4622-4625 (1964).
6. J. Lavergne, H. W. Trissl, Theory of fluorescence induction in photosystem II: derivation of analytical expressions in a model including exciton-radical-pair equilibrium and restricted energy transfer between photosynthetic units. *Biophys. J.* **68**, 2474-2492 (1995).
7. S. Sheinok, P. Leveque, P. Sonveaux, B. Driesschaert, B. Gallez, Comparison of different methods for measuring the superoxide radical by EPR spectroscopy in buffer, cell lysates and cells. *Free Rad. Res.* **52**, 1182-1196 (2018).
